# Supplementary material for: Prolonged prone positioning under VV-ECMO is safe and improves oxygenation and respiratory compliance
Source: PubMed Central journal article supplement (PMC4633431; doi:10.1186/s13613-015-0078-4), 2015-11-04

Plateau Pressure  
cmH<sub>2</sub>O

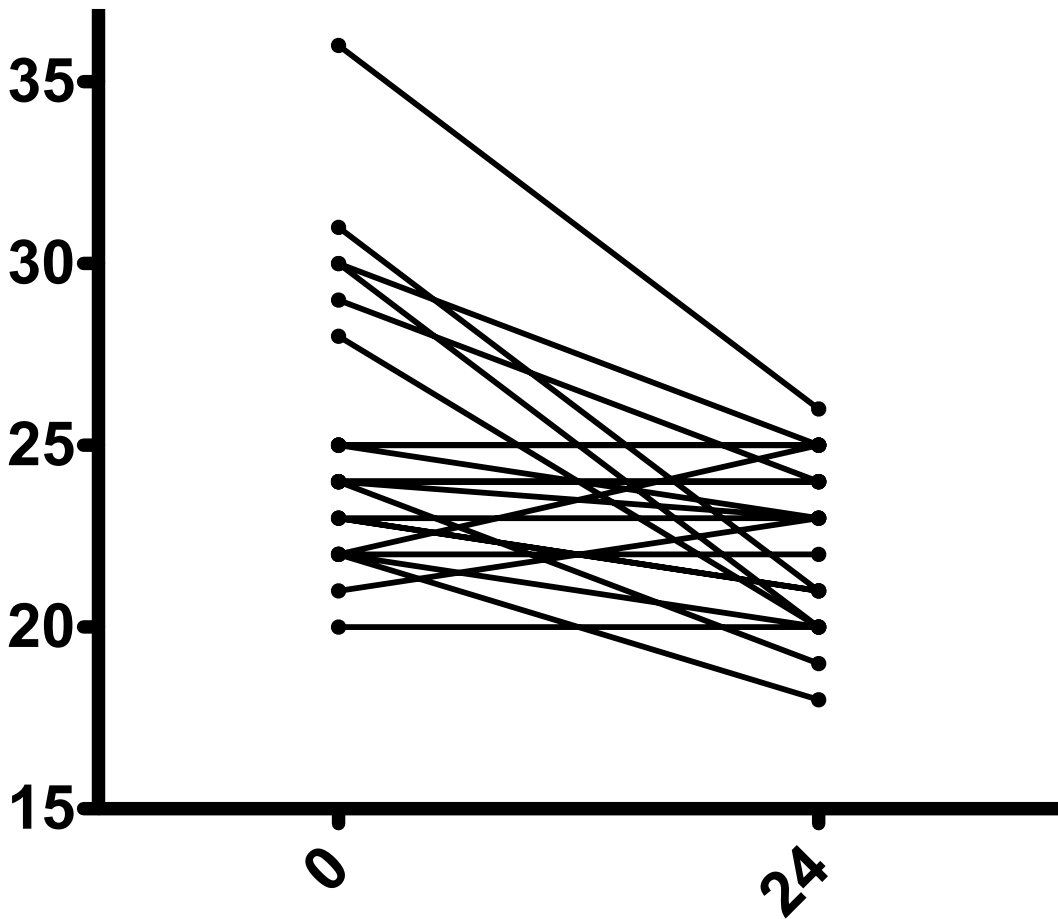

Supplement: 13613_2015_78_MOESM2_ESM.pdf [file 13613_2015_78_MOESM2_ESM.pdf]
